# Supplementary material
Source: Springer Nature journal article supplement (https://www.springermedizin.de/resource/supplementary/12876_2012_965_MOESM4_ESM.pdf/9437798)

### Reactor 3

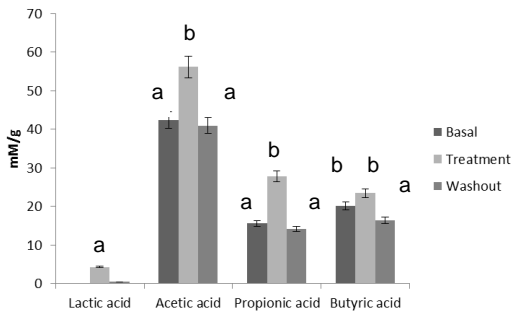

### Reactor 4

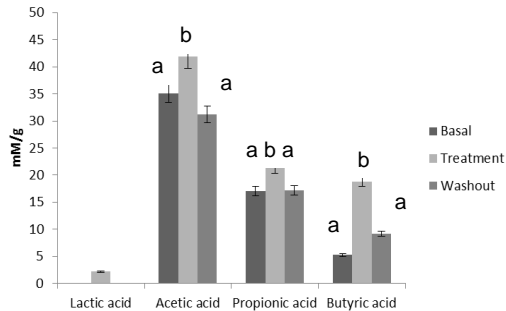

### Reactor 5

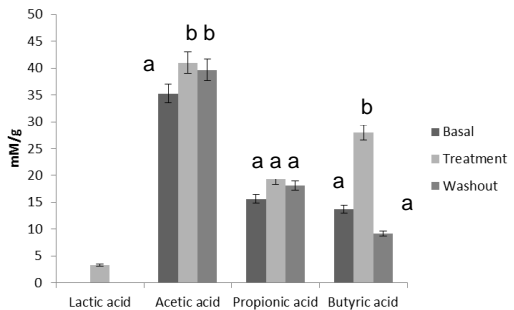

Supplement: MOESM4 [file 9437798]
